# Supplementary material for: Systematic Pan-Cancer Analysis Reveals X-C Motif Chemokine Receptor 1 as a Prognostic and Immunological Biomarker
Source: MDPI journal article supplement (doi:10.3390/genes14101961), 2023-10-19
Supplement: s1 [file s1]

Supplementary data for

# **Systematic Pan-Cancer Analysis Reveals X-C Motif Chemokine Receptor 1as a Prognostic and Immunological Biomarker**

**Likun Cui <sup>1,†</sup>, Liye Zhu <sup>1,†</sup>, Jie Chen <sup>1</sup>, Chunzhen Li <sup>1</sup>, Yizhi Yu <sup>1,\*</sup> and Sheng Xu <sup>1,2,\*</sup>**

<sup>1</sup> National Key Laboratory of Medical Immunology and Institute of Immunology, Naval Medical University, Shanghai 200433, China; poppy199609@163.com (L.C.); zhuly339@163.com (L.Z.); chenj12112021@163.com (J.C.); chunzhenli@smmu.edu.cn (C.L.)

<sup>2</sup> Shanghai Institute of Stem Cell Research and Clinical Translation, Shanghai 200120, China

\* Correspondence: yuyz@immunol.org (Y.Y.); xusheng@immunol.org (S.X.)

† These authors contributed equally to this work.

**Supplementary Table S1.** Primers of *XCRI* for quantitative real-time PCR.

| Primer          | Sequence                |
|-----------------|-------------------------|
| <i>XCRI</i> -F  | ATGGAGTCCTCAGGCAACC     |
| <i>XCRI</i> -R  | CGAGGGTAGCAAAGACCCA     |
| <i>GAPDH</i> -F | CTGGGCTACACTGAGCACC     |
| <i>GAPDH</i> -R | AAGTGGTCGTTGAGGGCAATG   |
| <i>CXCL9</i> -F | CCAGTAGTGAGAAAGGGTCGC   |
| <i>CXCL9</i> -R | AGGGCTTGGGGCAAATTGTT    |
| <i>CXCR3</i> -F | TTTGACCGCTACCTGAACATAGT |
| <i>CXCR3</i> -R | GGGAAGTTGTATTGGCAGTGG   |

**Supplementary Table S2.** Cox regression analysis in LIHC \*.

| Characteristic          | Low expression<br>of <i>XCRI</i> | High expression<br>of <i>XCRI</i> | p     |
|-------------------------|----------------------------------|-----------------------------------|-------|
| n                       | 187                              | 187                               |       |
| T stage, n (%)          |                                  |                                   | 0.009 |
| T1                      | 77 (20.8%)                       | 106 (28.6%)                       |       |
| T2                      | 52 (14%)                         | 43 (11.6%)                        |       |
| T3                      | 51 (13.7%)                       | 29 (7.8%)                         |       |
| T4                      | 7 (1.9%)                         | 6 (1.6%)                          |       |
| N stage, n (%)          |                                  |                                   | 1.000 |
| N0                      | 133 (51.6%)                      | 121 (46.9%)                       |       |
| N1                      | 2 (0.8%)                         | 2 (0.8%)                          |       |
| M stage, n (%)          |                                  |                                   | 0.626 |
| M0                      | 142 (52.2%)                      | 126 (46.3%)                       |       |
| M1                      | 3 (1.1%)                         | 1 (0.4%)                          |       |
| Pathologic stage, n (%) |                                  |                                   | 0.024 |
| Stage I                 | 73 (20.9%)                       | 100 (28.6%)                       |       |
| Stage II                | 46 (13.1%)                       | 41 (11.7%)                        |       |
| Stage III               | 52 (14.9%)                       | 33 (9.4%)                         |       |

| Characteristic          | Low expression<br>of <i>XCRI</i> | High expression<br>of <i>XCRI</i> | p       |
|-------------------------|----------------------------------|-----------------------------------|---------|
| Stage IV                | 3 (0.9%)                         | 2 (0.6%)                          | 0.005   |
| Tumor status, n (%)     |                                  |                                   |         |
| Tumor free              | 86 (24.2%)                       | 116 (32.7%)                       |         |
| With tumor              | 89 (25.1%)                       | 64 (18%)                          | 0.269   |
| Gender, n (%)           |                                  |                                   |         |
| Female                  | 55 (14.7%)                       | 66 (17.6%)                        |         |
| Male                    | 132 (35.3%)                      | 121 (32.4%)                       | 0.207   |
| BMI, n (%)              |                                  |                                   |         |
| <=25                    | 94 (27.9%)                       | 83 (24.6%)                        |         |
| >25                     | 73 (21.7%)                       | 87 (25.8%)                        | 0.196   |
| Age, n (%)              |                                  |                                   |         |
| <=60                    | 82 (22%)                         | 95 (25.5%)                        |         |
| >60                     | 105 (28.2%)                      | 91 (24.4%)                        | < 0.001 |
| OS event, n (%)         |                                  |                                   |         |
| Alive                   | 104 (27.8%)                      | 140 (37.4%)                       |         |
| Dead                    | 83 (22.2%)                       | 47 (12.6%)                        | 0.002   |
| DSS event, n (%)        |                                  |                                   |         |
| Alive                   | 129 (35.2%)                      | 158 (43.2%)                       |         |
| Dead                    | 52 (14.2%)                       | 27 (7.4%)                         | 0.004   |
| PFI event, n (%)        |                                  |                                   |         |
| Alive                   | 81 (21.7%)                       | 110 (29.4%)                       |         |
| Dead                    | 106 (28.3%)                      | 77 (20.6%)                        | 0.712   |
| Histologic grade, n (%) |                                  |                                   |         |
| G1                      | 27 (7.3%)                        | 28 (7.6%)                         |         |
| G2                      | 88 (23.8%)                       | 90 (24.4%)                        |         |

| Characteristic                              | Low expression<br>of <i>XCR1</i> | High expression<br>of <i>XCR1</i> | p     |
|---------------------------------------------|----------------------------------|-----------------------------------|-------|
| G3                                          | 62 (16.8%)                       | 62 (16.8%)                        | 0.621 |
| G4                                          | 8 (2.2%)                         | 4 (1.1%)                          |       |
| Residual tumor, n (%)                       |                                  |                                   |       |
| R0                                          | 165 (47.8%)                      | 162 (47%)                         | 0.604 |
| R1                                          | 10 (2.9%)                        | 7 (2%)                            |       |
| R2                                          | 1 (0.3%)                         | 0 (0%)                            |       |
| Adjacent hepatic tissue inflammation, n (%) |                                  |                                   | 0.360 |
| None                                        | 57 (24.1%)                       | 61 (25.7%)                        |       |
| Mild                                        | 52 (21.9%)                       | 49 (20.7%)                        |       |
| Severe                                      | 7 (3%)                           | 11 (4.6%)                         | 0.360 |
| Vascular invasion, n (%)                    |                                  |                                   |       |
| No                                          | 97 (30.5%)                       | 111 (34.9%)                       |       |
| Yes                                         | 58 (18.2%)                       | 52 (16.4%)                        |       |

\* Data was from RNAseq data in the level 3 HTSeq-FPKM format of the TCGA (<https://portal.gdc.cancer.gov/>) LIHC project.

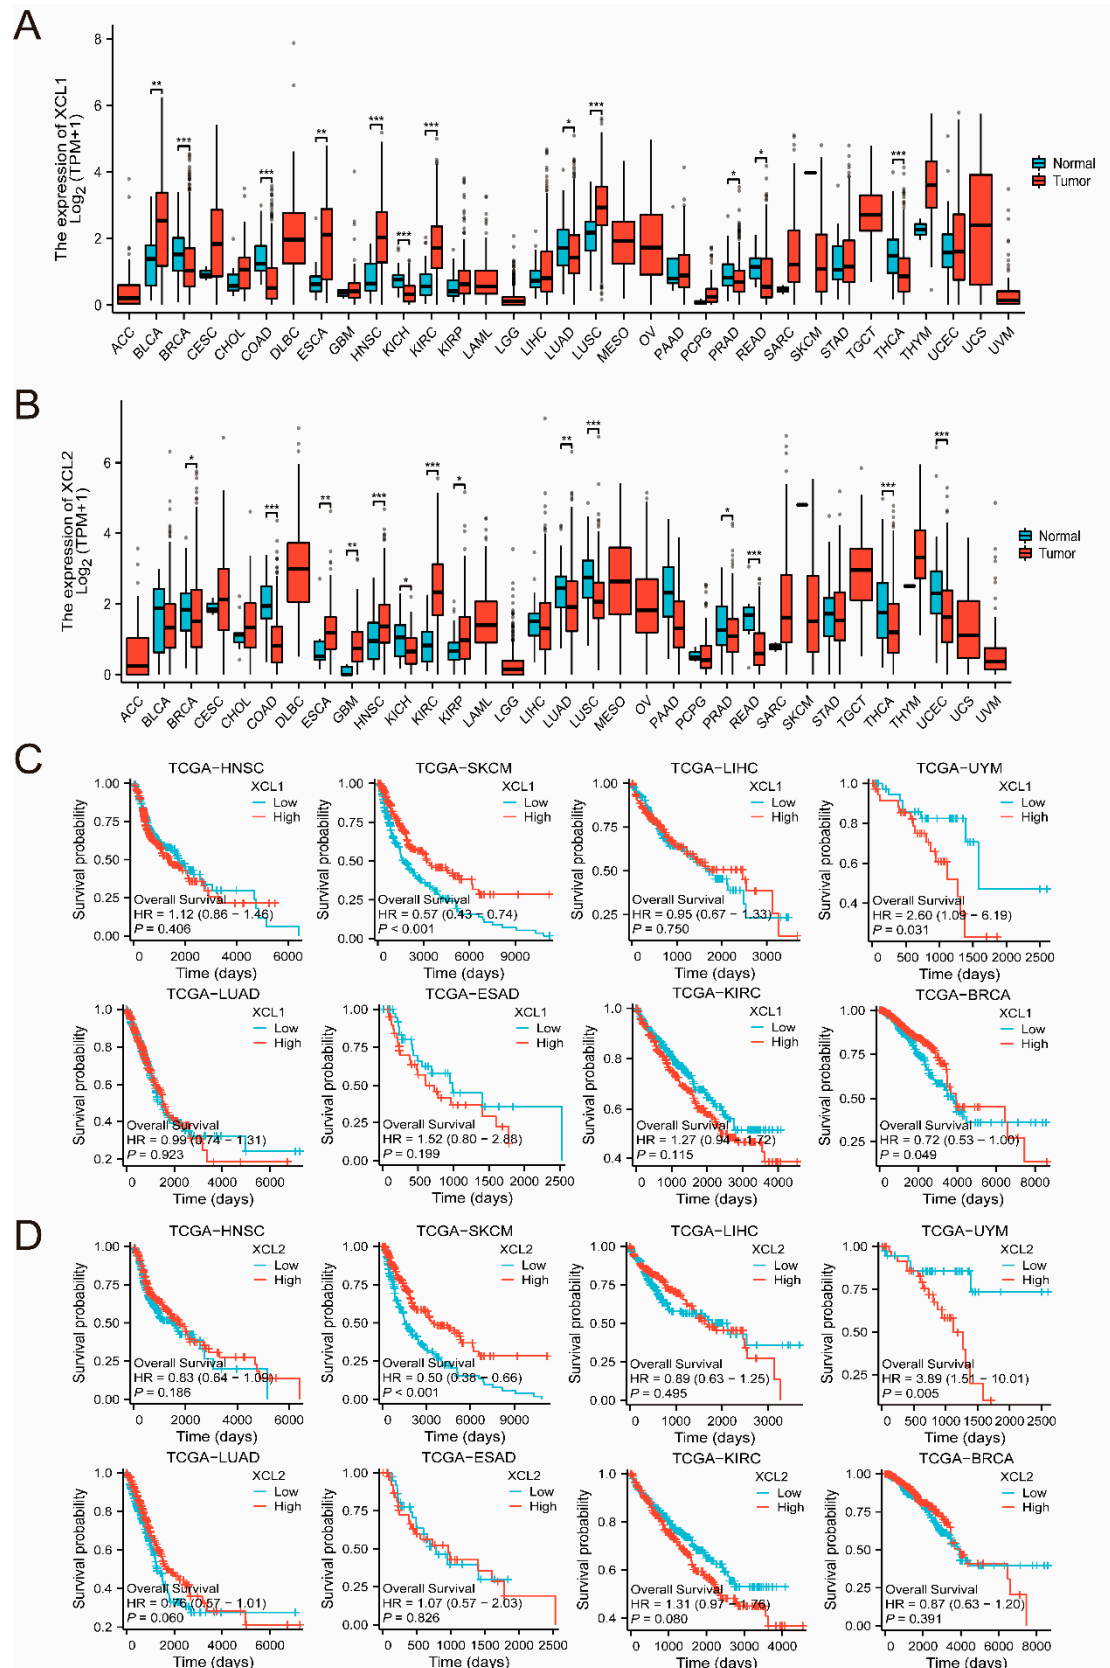

**Supplementary Figure S1. Expression of *XCL1/2* and Overall Survival (OS) analysis in pan-cancers based on TCGA database**

(A-B) Human *XCL1* and *XCL2* expression levels in pan-cancer with its para-cancerous normal tissues from TCGA database. (C-D) Overall Survival analysis of *XCL1* and *XCL2* among several types of tumors in the TCGA database.

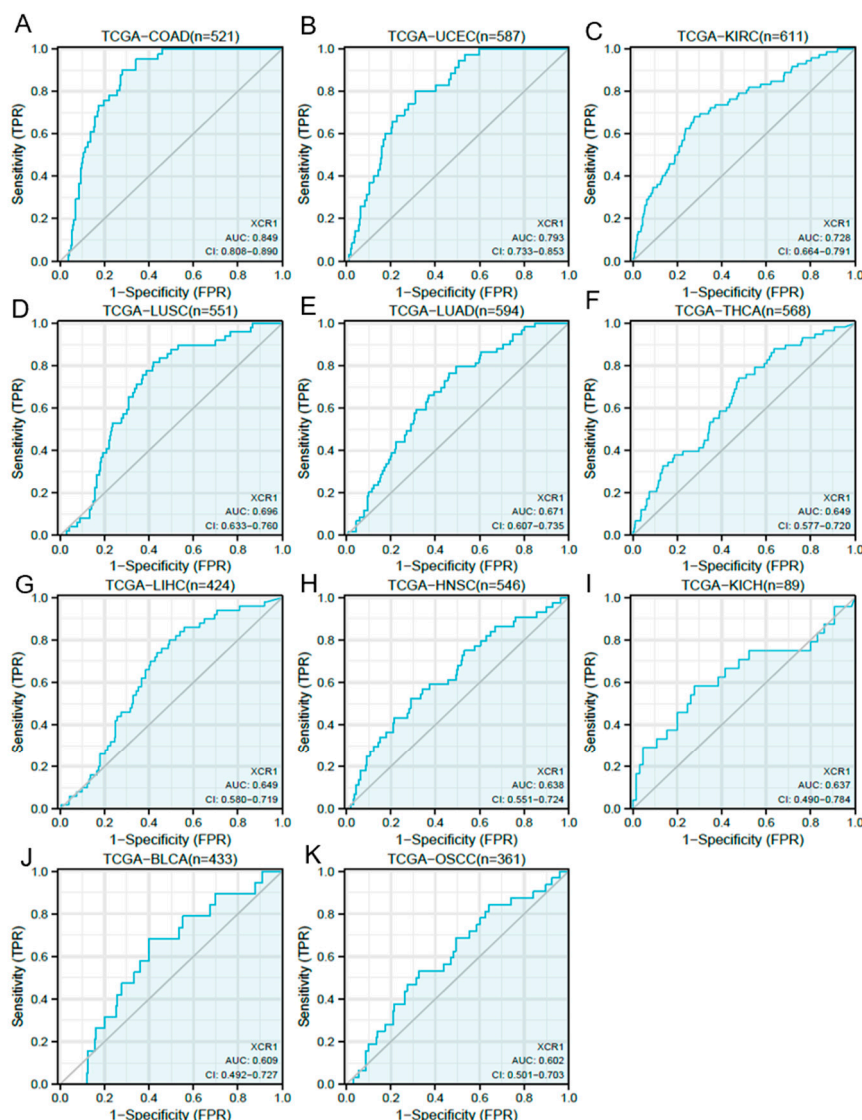

**Supplementary Figure S2.** Receiver operating curves showing relationship of sensitivity and 1 specificity based on *XCR1* expression in various cancers

(A-K) AUC: area under Curve; CI: confidence interval, Sensitivity/True Positive Rate (TPR): the number of true positive samples detected divides by the number of all true positive samples; Specificity: the number of true negative samples detected divides by the number of all true negative samples; 1- Specificity: the number of false-positive samples detected divides by the number of all true negative samples.

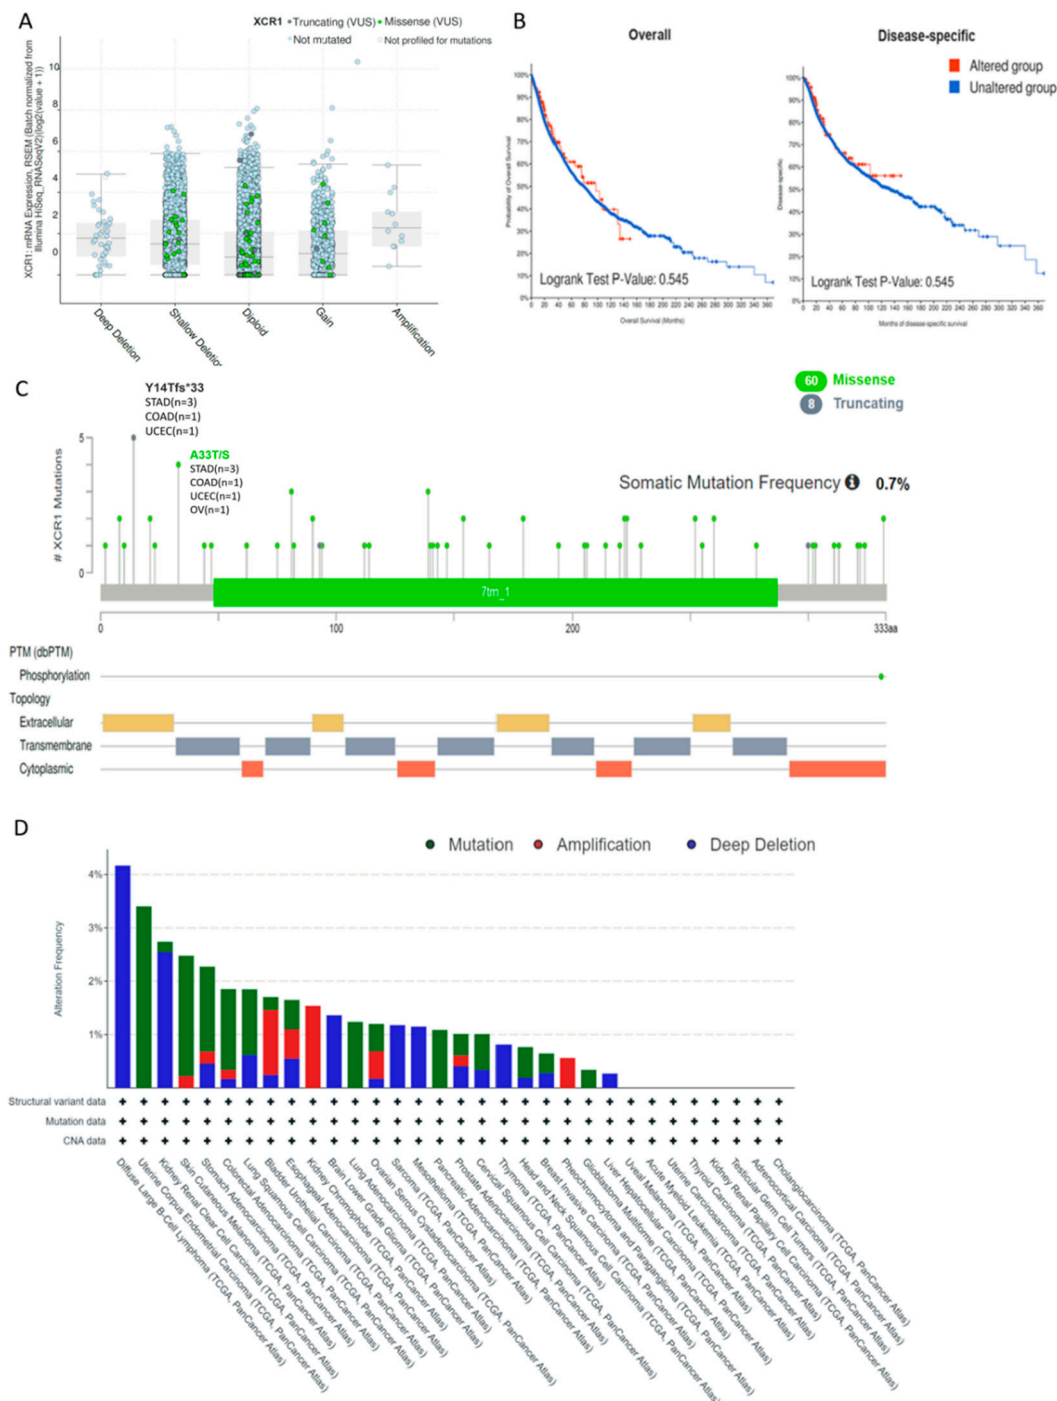

**Supplementary Figure S3. Mutation features of *XCR1* in pan-cancer**

(A) Association of *XCR1* copy number alteration with its mRNA expression in the TCGA cancer cohort. (B) Association between genetic alteration of *XCR1* and clinical survival (OS/DSS). (C) The alteration frequency with mutation type and mutation site. (D) Alteration frequency with the mutation types of *XCR1* in human pan-cancer.

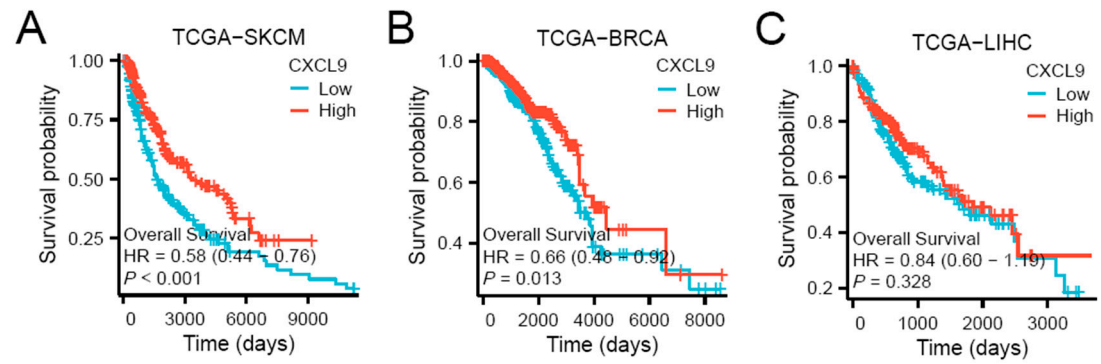

**Supplementary Figure S4.** Survival prognostic analysis of the expression of *CXCL9*

(A-C) Overall Survival analysis of *CXCL9* among SKCM, BRCA, and LIHC.
